# Supplementary material for: ATF3/SPI1/SLC31A1 Signaling Promotes Cuproptosis Induced by Advanced Glycosylation End Products in Diabetic Myocardial Injury
Source: MDPI journal article supplement (doi:10.3390/ijms24021667), 2023-01-14
Supplement: s1 [file s1]

## Supplementary Material

### 1. Supplementary Figure S1:

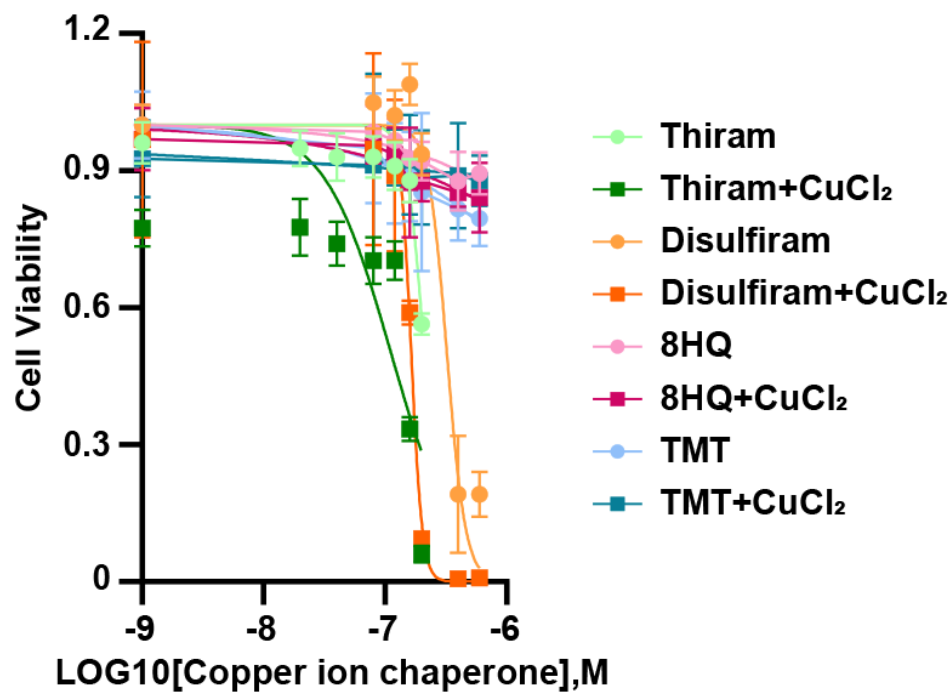

**Supplementary Figure 1:** Viability of AC16 cells after treatment with varied indicated copper ion chaperones with or without 10 μM CuCl<sub>2</sub>.

### 2. Supplementary Figure S2

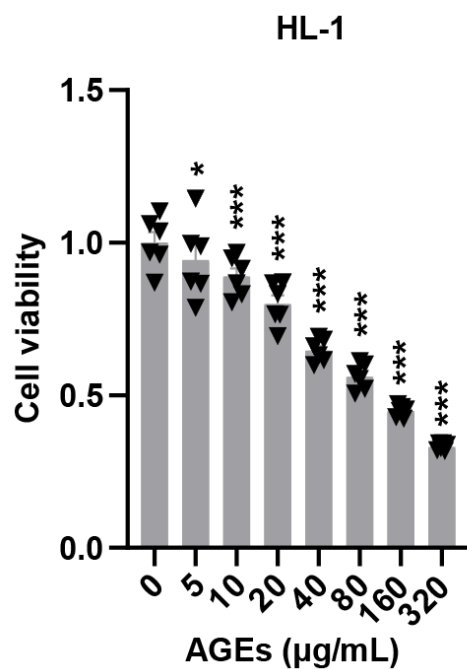

**Supplementary Figure 2:** Viability of HL-1 cells after treatment with AGEs of indicated concentrations.
